# Supplementary material for: Bottleneck size and selection level reproducibly impact evolution of antibiotic resistance
Source: PubMed Central journal article supplement (PMC8390372; doi:10.1038/s41559-021-01511-2), 2021-07-26
Supplement: 41559_2021_1511_MOESM1_ESM.pdf [file 41559_2021_1511_MOESM1_ESM.pdf]

**Supplementary information**

---

**Bottleneck size and selection level  
reproducibly impact evolution of antibiotic  
resistance**

---

In the format provided by the  
authors and unedited

**Supplementary Table 1: Statistical results of Welch t-tests for area under curve (AUC) of harmonic mean Population sizes from the GEN and CIP experiments.**

| Comparison        | GEN experiment |        |               | CIP experiment |        |                   |
|-------------------|----------------|--------|---------------|----------------|--------|-------------------|
|                   | t              | Df     | P             | t              | Df     | P                 |
| IC80 k50-IC20 k50 | 0.2012         | 13.279 | 0.8436        | 14.654         | 11.373 | <b>&lt;0.0001</b> |
| IC80 M5-IC20 M5   | 5.6754         | 7.4104 | <b>0.0006</b> | 5.9505         | 8.5935 | <b>0.0003</b>     |

The test compares the difference in AUC (harmonic mean population size over transfer) between the individual treatment groups.

**Supplementary Table 2: Statistical results of a general linear mixed model for yield over time for the GEN and CIP experiments.**

| Predictor      | GEN experiment |    |                   | CIP experiment |    |                   |
|----------------|----------------|----|-------------------|----------------|----|-------------------|
|                | $\chi^2$       | Df | P                 | $\chi^2$       | Df | P                 |
| IC             | 31.34          | 3  | <b>&lt;0.0001</b> | 16.05          | 3  | <b>&lt;0.0001</b> |
| BN             | 17.19          | 2  | <b>&lt;0.0001</b> | 33.35          | 2  | <b>&lt;0.0001</b> |
| Transfer       | 21.46          | 1  | <b>&lt;0.0001</b> | 48.44          | 1  | <b>&lt;0.0001</b> |
| IC*BN          | 4.47           | 6  | <b>0.0345</b>     | 1.54           | 6  | 0.2151            |
| IC*Transfer    | 15.40          | 3  | <b>&lt;0.0001</b> | 5.45           | 3  | <b>0.0195</b>     |
| BN*Transfer    | 5.97           | 2  | <b>0.0145</b>     | 2.98           | 2  | 0.0842            |
| IC*BN*Transfer | 0.73           | 6  | 0.3919            | 2.01           | 6  | 0.1565            |

The model tests the influence of drug concentration (IC), bottleneck size (BN) and time of transfer, as well as their individual interactions, on population yield. Formula: Yield ~ IC \* BN \* Transfer \* (1 | Well on plate).

**Supplementary Table 3: Statistical results of a Tukey's HSD test for difference in yield over time for the GEN and CIP experiments.**

| Comparison        | GEN experiment |                   | CIP experiment |                   |
|-------------------|----------------|-------------------|----------------|-------------------|
|                   | diff           | P                 | diff           | P                 |
| IC20 M5-IC20 k50  | 0.19           | <b>&lt;0.0001</b> | 0.43           | <b>&lt;0.0001</b> |
| IC80 k50-IC20 k50 | -0.11          | <b>0.0058</b>     | - 0.56         | <b>0.0003</b>     |
| IC80 M5-IC20 k50  | -0.05          | 0.4816            | 0.15           | 0.0974            |
| IC80 k50-IC20 M5  | -0.31          | <b>&lt;0.0001</b> | - 0.99         | <b>&lt;0.0001</b> |
| IC80 M5-IC20 M5   | -0.24          | <b>&lt;0.0001</b> | - 0.28         | <b>0.0001</b>     |
| IC80 M5-IC80 k50  | 0.06           | 0.2979            | 0.71           | <b>&lt;0.0001</b> |

The test compares the difference in mean yield between the individual treatment groups. Formula: Yield ~ Treatment.

**Supplementary Table 4: Statistical results of a Tukey's HSD test for area under curve (AUC) of growth rate from evolved populations from the GEN and CIP experiments.**

| Comparison        | GEN experiment |               | CIP experiment |                   |
|-------------------|----------------|---------------|----------------|-------------------|
|                   | diff           | P             | diff           | P                 |
| IC20 M5-IC20 k50  | -0.0086        | <b>0.0069</b> | 0.0334         | <b>&lt;0.0001</b> |
| IC80 k50-IC20 k50 | -0.0004        | 0.9976        | -0.0916        | <b>&lt;0.0001</b> |
| IC80 M5-IC20 k50  | -0.0041        | 0.3691        | 0.0013         | 0.9956            |
| IC80 k50-IC20 M5  | 0.0082         | <b>0.0107</b> | -0.1250        | <b>&lt;0.0001</b> |
| IC80 M5-IC20 M5   | 0.0045         | 0.3199        | -0.0321        | <b>&lt;0.0001</b> |
| IC80 M5-IC80 k50  | -0.0037        | 0.4653        | 0.0929         | <b>&lt;0.0001</b> |

The test compares the difference in AUC (growth rate over transfer) between the individual treatment groups. Formula:  $AUC \sim Treatment$ .

**Supplementary Table 5: Drug concentrations used to test for evolved resistance in the GEN and CIP experiments (all concentrations given in ng/ml).**

|     | IC20 | IC80 | MIC | 2*MIC | 4*MIC | 8*MIC | 16*MIC |
|-----|------|------|-----|-------|-------|-------|--------|
| GEN | 380  | 500  | 600 | 1200  | 2400  | 4800  | 9600   |
| CIP | 15   | 40   | 60  | 120   | 240   | 480   | 960    |

**Supplementary Table 6: Linear mixed effect model results for evolved resistance for the GEN and CIP experiments.**

| Predictor | Df | GEN experiment |       |               | CIP experiment |       |                   |
|-----------|----|----------------|-------|---------------|----------------|-------|-------------------|
|           |    | Sum Sq         | F     | P             | Sum Sq         | F     | P                 |
| IC        | 3  | 0.22           | 0.71  | 0.4084        | 6.32           | 32.70 | <b>&lt;0.0001</b> |
| BN        | 2  | 0.24           | 0.76  | 0.3903        | 0.64           | 3.33  | 0.0823            |
| IC*BN     | 6  | 3.53           | 11.43 | <b>0.0022</b> | 3.84           | 19.87 | <b>0.0002</b>     |

The model tests the influence of drug concentration (IC), bottleneck size (BN) and their interaction on evolved resistance (AUC) to the treatment drug. Formula:  $AUC \sim IC * BN$ .

**Supplementary Table 7: Statistical results of Tukey's HSD for evolved resistance for the GEN and CIP experiments.**

| Comparison        | GEN experiment |               | CIP experiment |                   |
|-------------------|----------------|---------------|----------------|-------------------|
|                   | diff           | P             | diff           | P                 |
| IC20 M5-IC20 k50  | -0.83          | <b>0.0292</b> | - 0.78         | <b>0.0094</b>     |
| IC80 k50-IC20 k50 | -0.49          | 0.3110        | - 0.69         | 0.4646            |
| IC80 M5-IC20 k50  | 0.03           | 0.9994        | 0.83           | <b>0.0059</b>     |
| IC80 k50-IC20 M5  | 0.34           | 0.6257        | 0.09           | 0.9975            |
| IC80 M5-IC20 M5   | 0.86           | <b>0.0280</b> | 1.61           | <b>&lt;0.0001</b> |
| IC80 M5-IC80 k50  | 0.53           | 0.2841        | 1.52           | <b>0.0184</b>     |

The test compares the difference in mean resistance (AUC) between the individual treatment groups. Formula:  $AUC \sim Treatment$ .

**Supplementary Table 8: Statistical results of a Tukey's HSD test for minimal inhibitory concentrations (MIC) of evolved populations from the GEN and CIP experiments.**

| Comparison        | GEN experiment |               | CIP experiment |                   |
|-------------------|----------------|---------------|----------------|-------------------|
|                   | diff           | P             | diff           | P                 |
| IC20 M5-IC20 k50  | -6832.5        | <b>0.0199</b> | -682.5         | <b>0.0086</b>     |
| IC80 k50-IC20 k50 | -4350          | 0.3089        | -540           | 0.7728            |
| IC80 M5-IC20 k50  | -2603.57       | 0.8545        | 900            | <b>0.0003</b>     |
| IC80 k50-IC20 M5  | 2475           | 0.8635        | 143            | 0.9997            |
| IC80 M5-IC20 M5   | 4221.43        | 0.3834        | 1582.5         | <b>&lt;0.0001</b> |
| IC80 M5-IC80 k50  | 1764           | 0.9760        | 1440           | <b>0.0091</b>     |

The test compares the difference in MIC between the individual treatment groups. Formula: MIC ~ Treatment.

**Supplementary Table 9: Number of mutations in most frequently affected genes per treatment group at the final transfer of the GEN experiment.**

| Gene        | IC20-k50 | IC20-M5 | IC80-k50 | IC80-M5 | Total |
|-------------|----------|---------|----------|---------|-------|
| <i>ptsP</i> | 1        | 13      | 2        | 4       | 20    |
| <i>pmrB</i> | 5        | 0       | 1        | 7       | 13    |
| <i>parS</i> | 3        | 0       | 0        | 1       | 4     |
| <i>parR</i> | 1        | 0       | 3        | 1       | 5     |
| <i>phoQ</i> | 1        | 0       | 2        | 0       | 3     |
| <i>rbsR</i> | 0        | 2       | 0        | 0       | 2     |
| <i>HPr</i>  | 0        | 2       | 0        | 1       | 3     |

**Supplementary Table 10: Number of mutations in most frequently affected genes per treatment group at the final transfer of CIP experiment.**

| Gene        | IC20-k50 | IC20-M5 | IC80-k50 | IC80-M5 | Total |
|-------------|----------|---------|----------|---------|-------|
| <i>mexS</i> | 4        | 0       | 0        | 10      | 14    |
| <i>mexZ</i> | 7        | 0       | 0        | 0       | 7     |
| <i>nfxB</i> | 1        | 0       | 0        | 6       | 7     |
| <i>copZ</i> | 4        | 0       | 0        | 0       | 4     |

**Supplementary Table 11: Shannon's diversity indices H and Hmax for each treatment group for the GEN and CIP experiments.**

| Treatment | GEN experiment |      | CIP experiment |      |
|-----------|----------------|------|----------------|------|
|           | Shannon's H    | Hmax | Shannon's H    | Hmax |
| IC20-k50  | 3.27           | 3.46 | 2.44           | 2.81 |
| IC20-M5   | 2.04           | 2.58 | 0.97           | 1    |
| IC80-k50  | 2.85           | 3    | 1              | 1    |
| IC80-M5   | 2.05           | 2.32 | 1.58           | 1.58 |

**Supplementary Table 12: General linear model results for evolved resistance in populations carrying either *pmrB* or *ptsP* mutations.**

| Predictor | Df | Sum Sq | F     | P                 |
|-----------|----|--------|-------|-------------------|
| Treatment | 3  | 3.56   | 12.25 | <b>0.0002</b>     |
| Gene      | 1  | 3.12   | 32.24 | <b>&lt;0.0001</b> |

The model tests the influence of treatment regimen and gene variant on evolved resistance (AUC). Formula: AUC ~ Treatment + Gene.

**Supplementary Table 13: Clones used in the three competition experiments.**

| Competition Experiment | Treatment during evolution experiment | <i>pmrB</i> mutant from population | <i>ptsP</i> mutant from population | control |
|------------------------|---------------------------------------|------------------------------------|------------------------------------|---------|
| 1                      | IC80-k50                              | D12                                | A12                                | PA14    |
| 2                      | IC20                                  | A6 (k50)                           | B11 (M5)                           | PA14    |
| 3                      | IC80-M5                               | A5                                 | E7                                 | PA14    |

**Supplementary Table 14: Tukey HSD results for multiple pairwise-comparison of frequency of *ptsP* mutants in competition against *pmrB* mutants and treatment group.**

| Comparison       | diff   | p adj.            |
|------------------|--------|-------------------|
| IC20 M5-IC20 k50 | - 0.19 | <b>0.0138</b>     |
| IC80k50-IC20 k50 | - 0.32 | <b>&lt;0.0001</b> |
| IC80 M5-IC20 k50 | - 0.06 | 0.8671            |
| IC80 k50-IC20 M5 | - 0.17 | <b>0.0352</b>     |
| IC80 M5-IC20 M5  | - 0.14 | 0.1457            |
| IC80 M5-IC80 k50 | - 0.10 | 0.3983            |

The test compares the difference in mean frequency of *ptsP* clones in competition between the individual treatments. Formula: Frequency ~ Treatment

**Supplementary Table 15: Sequence-specific primers for amplicon sequencing (first PCR step).**

| Name                 | Populations | Sequence                                                   |
|----------------------|-------------|------------------------------------------------------------|
| pmrB-5636922-forward | A5, D12, A6 | ACACTCTTCCCTACACGACGCTCTCCGATCTGACCTTGCCACCGAA<br>GACC     |
| pmrB-5637204-forward | A5, G8, A6  | ACACTCTTCCCTACACGACGCTCTCCGATCTACCATGAACCTGCTG<br>CTGTT    |
| ptsP-394249-forward  | E7          | ACACTCTTCCCTACACGACGCTCTCCGATCTTTCATGATCAACGAC<br>CGCTTC   |
| ptsP-393899-forward  | E7          | ACACTCTTCCCTACACGACGCTCTCCGATCTCTCGGCTCGGGCAAC<br>TC       |
| ptsP-393042-forward  | A12         | ACACTCTTCCCTACACGACGCTCTCCGATCTAACAAAGCGTTCCATC<br>GGCAA   |
| ptsP-394724-forward  | B11         | ACACTCTTCCCTACACGACGCTCTCCGATCTAGGTCGACTTCCTTT<br>CGGTC    |
| pmrB-5636922-reverse | A5, D12, A6 | GTGACTGGAGTTCAGACGTGTGCTCTCCGATCTCACAGGGCGTAG<br>CCGAG     |
| pmrB-5637204-reverse | A5, G8, A6  | GTGACTGGAGTTCAGACGTGTGCTCTCCGATCTGACCTCGGCCTGC<br>ACTTC    |
| ptsP-394249-reverse  | E7          | GTGACTGGAGTTCAGACGTGTGCTCTCCGATCTCGGGTTGTCTTCC<br>TTGATCGG |
| ptsP-393899-reverse  | E7          | GTGACTGGAGTTCAGACGTGTGCTCTCCGATCTGGTAGCCATCGAC<br>GATCAGG  |
| ptsP-393042-reverse  | A12         | GTGACTGGAGTTCAGACGTGTGCTCTCCGATCTCCATCACCCGCCT<br>ATGGTG   |
| ptsP-394724-reverse  | B11         | GTGACTGGAGTTCAGACGTGTGCTCTCCGATCTCATCGTCGACCAC<br>CTTCTTCA |

Names consist of the target gene, the position of the SNP in the genome and F or R for forward or reverse primer. The population(s) for which the primer amplifies the SNP region are listed. Overhangs of the primers are labelled in black. Sequence-specific parts of primers are in labelled in red.

**Supplementary Table 16: Sequencing primers for amplicon sequencing (second PCR step).**

| <b>2<sup>nd</sup> PCR</b> | <b>Name</b> | <b>Sequence</b>                                                   |
|---------------------------|-------------|-------------------------------------------------------------------|
| forward                   | F-1         | AATGATACGGCGACCACCGAGATCTACACA <b>AACCGCAT</b> ACACTCTTTCCCTACACG |
|                           | F-2         | AATGATACGGCGACCACCGAGATCTACACA <b>AAGGCCTT</b> ACACTCTTTCCCTACACG |
|                           | F-3         | AATGATACGGCGACCACCGAGATCTACACA <b>AGAGTGTG</b> ACACTCTTTCCCTACACG |
|                           | F-4         | AATGATACGGCGACCACCGAGATCTACACA <b>CACAAGTC</b> ACACTCTTTCCCTACACG |
|                           | F-5         | AATGATACGGCGACCACCGAGATCTACACA <b>CGTTCCTA</b> ACACTCTTTCCCTACACG |
|                           | F-6         | AATGATACGGCGACCACCGAGATCTACACA <b>GCTTGGAT</b> ACACTCTTTCCCTACACG |
|                           | F-7         | AATGATACGGCGACCACCGAGATCTACACA <b>GTCAACAC</b> ACACTCTTTCCCTACACG |
|                           | F-8         | AATGATACGGCGACCACCGAGATCTACACA <b>GTCCTGA</b> ACACTCTTTCCCTACACG  |
|                           | F-9         | AATGATACGGCGACCACCGAGATCTACACT <b>TCTCGTCA</b> ACACTCTTTCCCTACACG |
|                           | F-10        | AATGATACGGCGACCACCGAGATCTACACT <b>TTGGTACG</b> ACACTCTTTCCCTACACG |
| reverse                   | R-A         | CAAGCAGAAGACGGCATA <b>CGAGATAACCGGA</b> AGTGACTGGAGTTCAGACG       |
|                           | R-B         | CAAGCAGAAGACGGCATA <b>CGAGATAGAGTGAC</b> GTGACTGGAGTTCAGACG       |
|                           | R-C         | CAAGCAGAAGACGGCATA <b>CGAGATCAACTGGT</b> GTGACTGGAGTTCAGACG       |
|                           | R-D         | CAAGCAGAAGACGGCATA <b>CGAGATCGTTCGTT</b> GTGACTGGAGTTCAGACG       |
|                           | R-E         | CAAGCAGAAGACGGCATA <b>CGAGATCTGTTCA</b> CGTGACTGGAGTTCAGACG       |
|                           | R-F         | CAAGCAGAAGACGGCATA <b>CGAGATGCTTGCA</b> AGTGACTGGAGTTCAGACG       |
|                           | R-G         | CAAGCAGAAGACGGCATA <b>CGAGATGTCAACTG</b> GTGACTGGAGTTCAGACG       |
|                           | R-H         | CAAGCAGAAGACGGCATA <b>CGAGATTCCTCAT</b> GGTGACTGGAGTTCAGACG       |
|                           | R-I         | CAAGCAGAAGACGGCATA <b>CGAGATTCGACTAG</b> GTGACTGGAGTTCAGACG       |
|                           | R-J         | CAAGCAGAAGACGGCATA <b>CGAGATTTGCAAGC</b> GTGACTGGAGTTCAGACG       |

Barcodes are labelled in blue. Illumina adapters are labelled in black.
